# Supplementary material
Source: HighWire-hosted journal article supplement (https://gpsych.bmj.com/content/35/1/e100527)
Supplement: inline-supplementary-material-1 [file inline-supplementary-material-1.pdf]

We are now supplementing the questionnaire entries and usage methods.

### Chinese Version

#### 抑郁症患者心理社会功能问卷

指导语：请根据您的主观感受、自我评价以及您在生活中的能力来回答下列问题。每个问题均有 5 个选项，请您按照最近一周的实际情况选出最符合的选项，在相应的选项上划“√”。

|                                   |       |       |       |        |        |
|-----------------------------------|-------|-------|-------|--------|--------|
| 1. 我对自己的生活现状感到                    | 1 很喜欢 | 2 较喜欢 | 3 一般  | 4 不太喜欢 | 5 很不喜欢 |
| 2. 我在日常生活中充满活力                    | 1 很同意 | 2 较同意 | 3 不确定 | 4 较不同意 | 5 很不同意 |
| 3. 我觉得生命有意义、有目标                   | 1 很同意 | 2 较同意 | 3 不确定 | 4 较不同意 | 5 很不同意 |
| 4. 我生活中的愉快或喜悦感觉                   | 1 很多  | 2 比较多 | 3 有一些 | 4 比较少  | 5 很少   |
| 5. 总体上，我对我的生活感到                   | 1 很满意 | 2 较满意 | 3 不确定 | 4 较不满意 | 5 很不满意 |
| 6. 想到大多数娱乐游戏或体育活动时，我没有回避、焦虑而是充满热情 | 1 总是  | 2 经常  | 3 有时  | 4 偶尔   | 5 无    |
| 7. 我很难有效地调节自己的情绪*                 | 5 很同意 | 4 较同意 | 3 不确定 | 2 较不同意 | 1 很不同意 |
| 8. 我对我的未来抱有很大希望                   | 1 很同意 | 2 较同意 | 3 不确定 | 4 较不同意 | 5 很不同意 |
| 9. 我感到我是一个有价值的人，至少与身边的大多数人一样      | 1 很同意 | 2 较同意 | 3 不确定 | 4 较不同意 | 5 很不同意 |
| 10. 总体上，我工作或活动的时间减少了*             | 5 很同意 | 4 较同意 | 3 不确定 | 2 较不同意 | 1 很不同意 |
| 11. 我做事情（工作、学习或家务活动）的效率下降了*       | 5 很同意 | 4 较同意 | 3 不确定 | 2 较不同意 | 1 很不同意 |
| 12. 我尽量回避社交或其他外出活动*               | 5 总是  | 4 经常  | 3 有时  | 2 偶尔   | 1 无    |
| 13. 我会为自己安排一些休闲放松的活动              | 1 总是  | 2 经常  | 3 有时  | 4 偶尔   | 5 无    |
| 14. 我能够很好地理解别人的意见或建议              | 1 总是  | 2 经常  | 3 有时  | 4 偶尔   | 5 无    |
| 15. 我能够为我的爱人或其他家人提供支持或陪伴          | 1 总是  | 2 经常  | 3 有时  | 4 偶尔   | 5 无    |
| 16. 我能在生活中找到许多兴趣或乐趣               | 1 总是  | 2 经常  | 3 有时  | 4 偶尔   | 5 无    |
| 17. 在家庭之外，我会主动寻求朋友们的理解和支持         | 1 总是  | 2 经常  | 3 有时  | 4 偶尔   | 5 无    |
| 18. 我与周围群体（如社区、同事、亲戚朋友或其他团体）的相处   | 1 非常好 | 2 较好  | 3 一般  | 4 不太好  | 5 非常不好 |

**计分与解释：**本问卷包括主观幸福感（第 1-5 题）、心理认知（第 6-9 题）与社会功能（第 10-18 题）三个维度，共 18 个项目，采用 5 级评分（1-5 分），其中第 7、10、11、12 项为反向计分题，已用\*标注。问卷总分越高，则说明心理社会功能受损越严重。

**English Version****Psychosocial Functioning Questionnaire for Patients with Major Depression Disorder**

Instructions: Please answer the following questions based on your subjective feelings, self-evaluation, and your ability in your life. Each question has 5 options, please select the most suitable option according to the actual situation in the last week, and tick the corresponding option box with "√".

|                                                                                                          |                            |                         |                |                               |                              |
|----------------------------------------------------------------------------------------------------------|----------------------------|-------------------------|----------------|-------------------------------|------------------------------|
| <b>1.</b> How do I feel about the current state of my life?                                              | 1<br>like it very<br>much  | 2<br>like it            | 3<br>neutral   | 4<br>like it not that<br>much | 5<br>dislike it very<br>much |
| <b>2.</b> I am full of energy in my daily life.                                                          | 1<br>strongly agree        | 2<br>agree              | 3<br>undecided | 4<br>disagree                 | 5<br>strongly disagree       |
| <b>3.</b> I have the feeling that life is meaningful and purposeful.                                     | 1<br>strongly agree        | 2<br>agree              | 3<br>undecided | 4<br>disagree                 | 5<br>strongly disagree       |
| <b>4.</b> How is the joy or pleasant feeling in my life?                                                 | 1<br>a lot                 | 2<br>more than a<br>few | 3<br>some      | 4<br>relatively few           | 5<br>very few                |
| <b>5.</b> How do I feel about my life in general?                                                        | 1<br>strongly<br>satisfied | 2<br>satisfied          | 3<br>undecided | 4<br>unsatisfied              | 5<br>strongly<br>unsatisfied |
| <b>6.</b> I am not avoidant or anxious but passionate when I think of most entertaining games or sports. | 1<br>always                | 2<br>often              | 3<br>sometimes | 4<br>occasionally             | 5<br>never                   |
| <b>7.</b> It is difficult for me to regulate my emotion effectively*.                                    | 5<br>strongly agree        | 4<br>agree              | 3<br>undecided | 2<br>disagree                 | 1<br>strongly disagree       |
| <b>8.</b> I have great hope for my future.                                                               | 1<br>strongly agree        | 2<br>agree              | 3<br>undecided | 4<br>disagree                 | 5<br>strongly disagree       |
| <b>9.</b> I feel that I am a valuable person, at least as most people around me.                         | 1<br>strongly agree        | 2<br>agree              | 3<br>undecided | 4<br>disagree                 | 5<br>strongly disagree       |
| <b>10.</b> In general, I spend less time on working or activities*.                                      | 5<br>strongly agree        | 4<br>agree              | 3<br>undecided | 2<br>disagree                 | 1<br>strongly disagree       |
| <b>11.</b> My efficiency in doing things like work, study, or housework decreased*.                      | 5<br>strongly agree        | 4<br>agree              | 3<br>undecided | 2<br>disagree                 | 1<br>strongly disagree       |
| <b>12.</b> I try to avoid socializing or other outgoing activities*.                                     | 5<br>always                | 4<br>often              | 3<br>sometimes | 2<br>occasionally             | 1<br>never                   |
| <b>13.</b> I arrange some leisure                                                                        | 1                          | 2                       | 3              | 4                             | 5                            |

|                                                                                                                                 |                |            |                |                   |                |
|---------------------------------------------------------------------------------------------------------------------------------|----------------|------------|----------------|-------------------|----------------|
| and relaxing activities for myself.                                                                                             | always         | often      | sometimes      | occasionally      | never          |
| <b>14.</b> I can understand others' opinions or suggestions very well.                                                          | 1<br>always    | 2<br>often | 3<br>sometimes | 4<br>occasionally | 5<br>never     |
| <b>15.</b> I can provide support or companionship for my lover or other family members.                                         | 1<br>always    | 2<br>often | 3<br>sometimes | 4<br>occasionally | 5<br>never     |
| <b>16.</b> I can find many interests or pleasures in my life.                                                                   | 1<br>always    | 2<br>often | 3<br>sometimes | 4<br>occasionally | 5<br>never     |
| <b>17.</b> Outside family, I initiatively seek the understanding and support from my friends.                                   | 1<br>always    | 2<br>often | 3<br>sometimes | 4<br>occasionally | 5<br>never     |
| <b>18.</b> My relationship with surrounding groups (such as the community, colleagues, relatives and friends, or other groups). | 1<br>very good | 2<br>good  | 3<br>fair      | 4<br>poor         | 5<br>very poor |

**Scoring and interpretation:** The questionnaire includes three dimensions: subjective well-being (1-5), psychological cognitive functioning (6-9) and social functioning (10-18), with a total of 18 items, which are graded at 5 levels (1-5). Items 7, 10, 11 and 12 are reverse scoring questions, which have been marked with \*. The higher the total score of the questionnaire, the more serious the impairment of psychosocial functioning is.
